# Supplementary material for: CO2 sensing of La0.875Ca0.125FeO3 in wet vapor: a comparison of experimental results and first-principles calculations
Source: Royal Society of Chemistry journal article supplement (doi:10.1039/c5cp00096c), 2015-01-01
Supplement: c5cp00096c1.pdf [file c5cp00096c1.pdf]

Electronic supplementary information

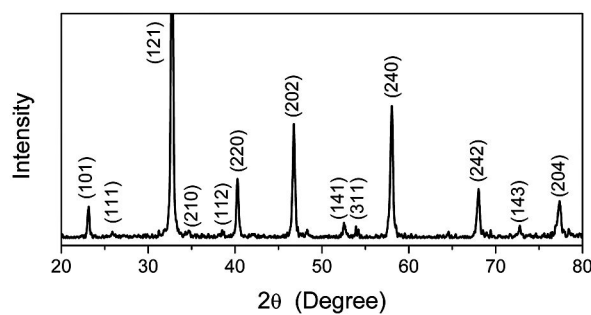

Figure S1 X-ray diffraction patterns of  $\text{La}_{0.875}\text{Ca}_{0.125}\text{FeO}_3$  annealed at  $800^\circ\text{C}$ .

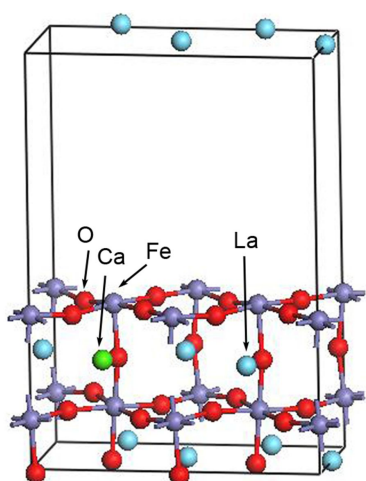

Figure S2 The optimized structure of  $\text{La}_{0.875}\text{Ca}_{0.125}\text{FeO}_3$  (010) surface
